# Supplementary material
Source: publisher site journal article supplement (https://static.cambridge.org/content/id/urn:cambridge.org:id:article:S0075426915000099/resource/name/ProbertandDickey-S0075426915000099supplementaryfigures.pdf)
Supplement: Supplementary file 1 [file ProbertandDickey-S0075426915000099supplementaryfigures.pdf]

**SUPPLEMENTARY FIGURES FOR**  
**THE ‘Φηεδιέστας’ INSCRIPTION FROM ARCHAIC ARGOS**  
**(SEG 11:314): A RECONSIDERATION**

PHILOMEN PROBERT AND ELEANOR DICKEY  
*University of Oxford and University of Reading*

The supplementary figures include both additional figures and higher-resolution versions of the figures included in the published version of the article.

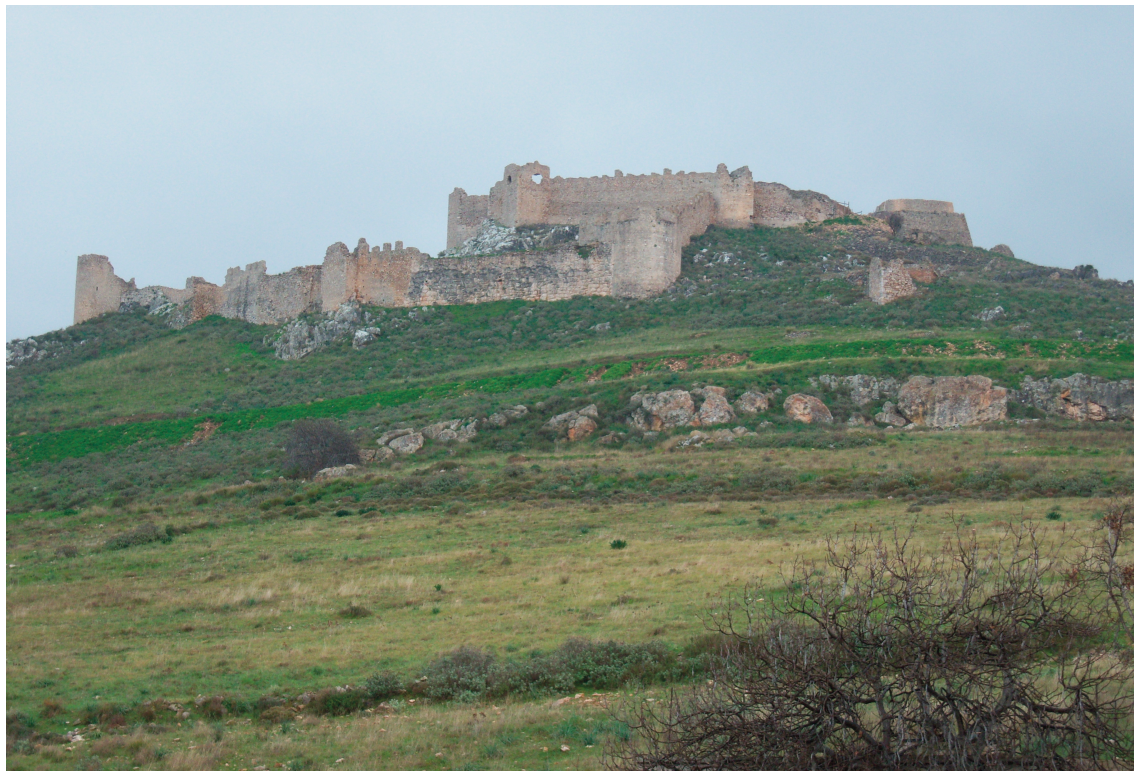

Supplementary fig. 1. Larissa castle today. The inscription is located inside the inner fortification, near the point where the wall of the outer fortification runs up the hill to join it (© E. Dickey).

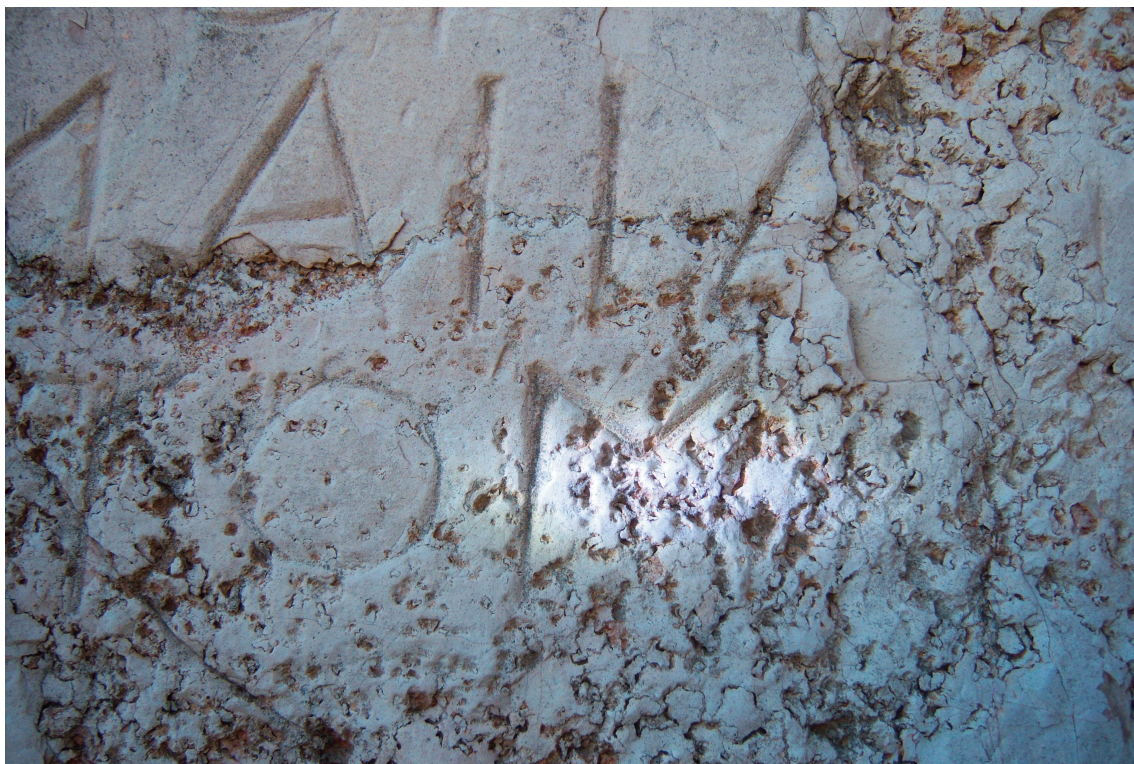

Supplementary fig. 2. Detail of stone, showing letters in line 3 read as τὸ μ[ and part of line 2 (© E. Dickey).

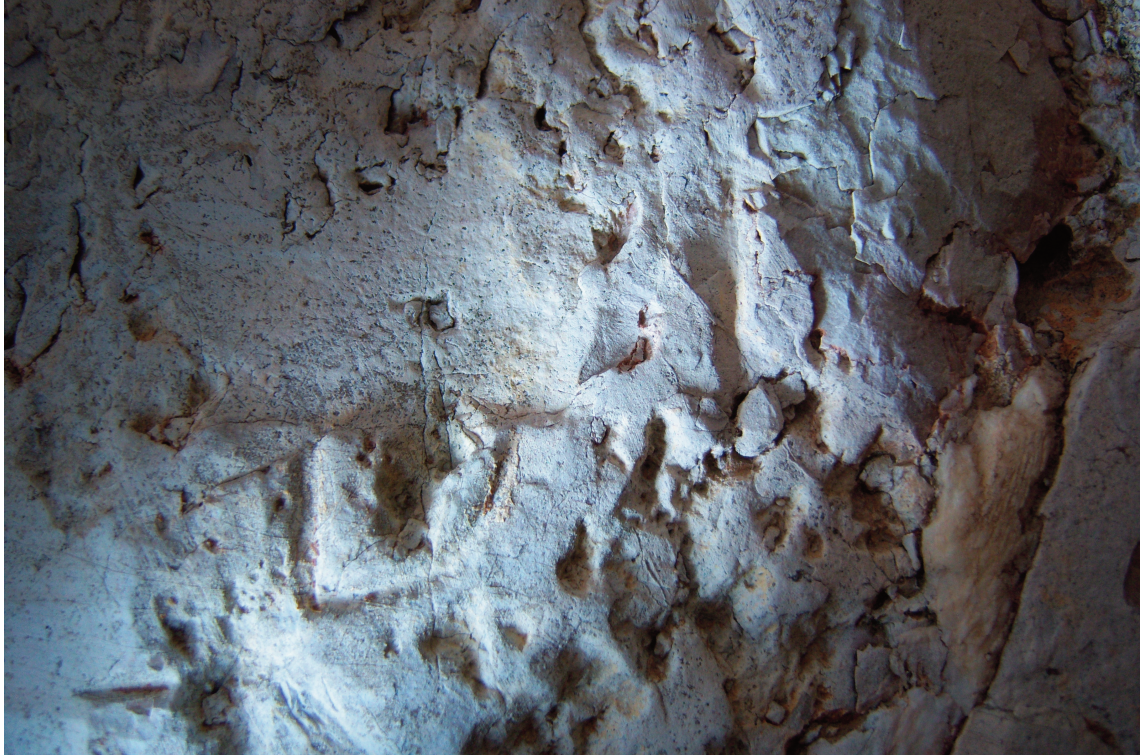

Supplementary fig. 3. Detail of stone, showing δξ at the end of line 3 (© E. Dickey).

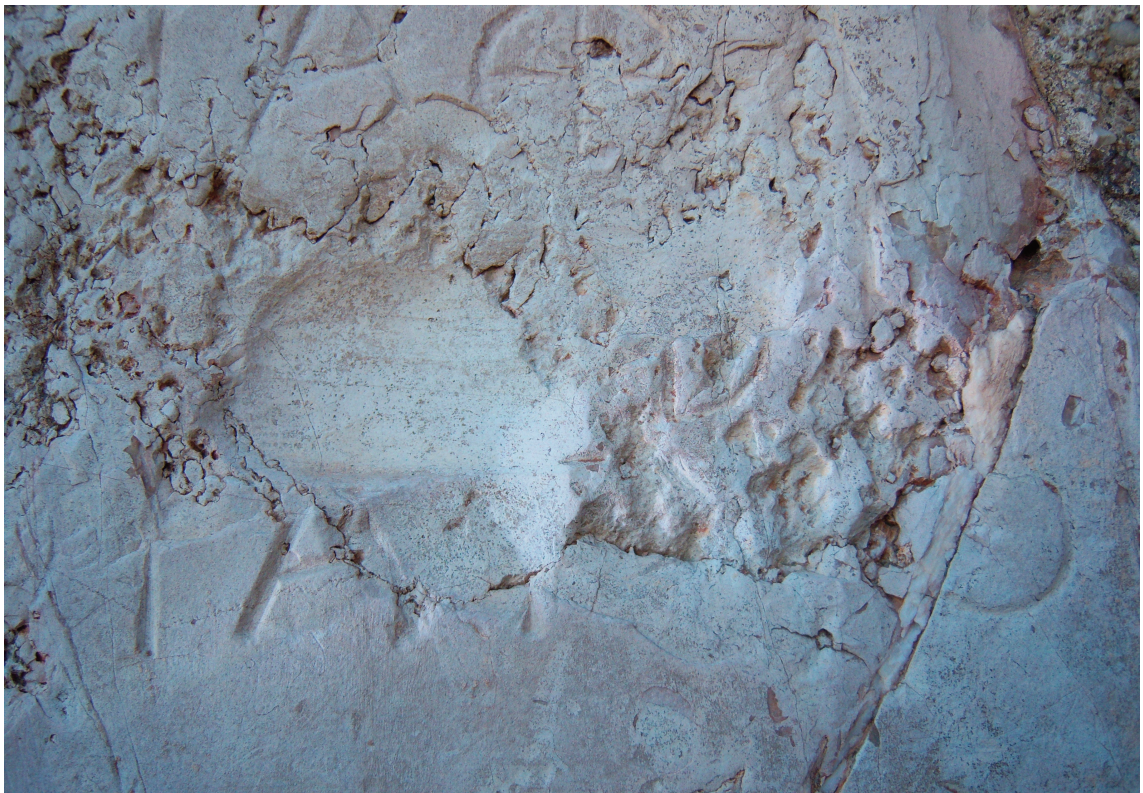

Supplementary fig. 4. Detail of stone, showing the end of line 3 and beginning of line 4 (© E. Dickey).

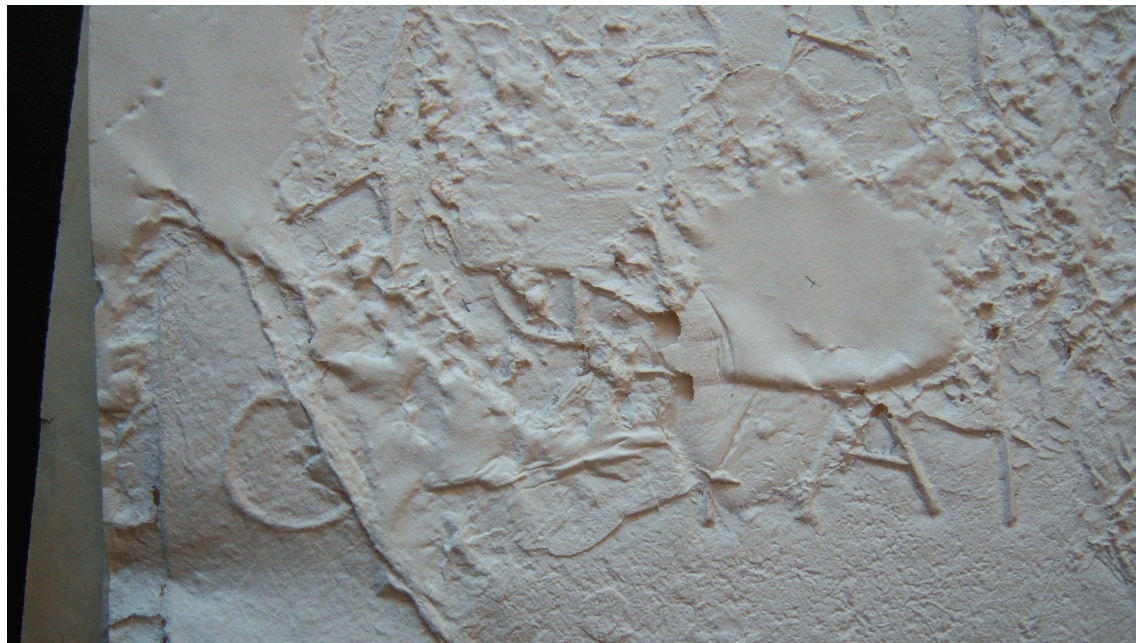

Supplementary fig. 5. Detail of Berlin squeeze, showing the end of line 3 and beginning of line 4, in mirror image owing to being a squeeze (photograph courtesy of the Berlin-Brandenburgische Akademie der Wissenschaften, Archiv der Inscriptiones Graecae).

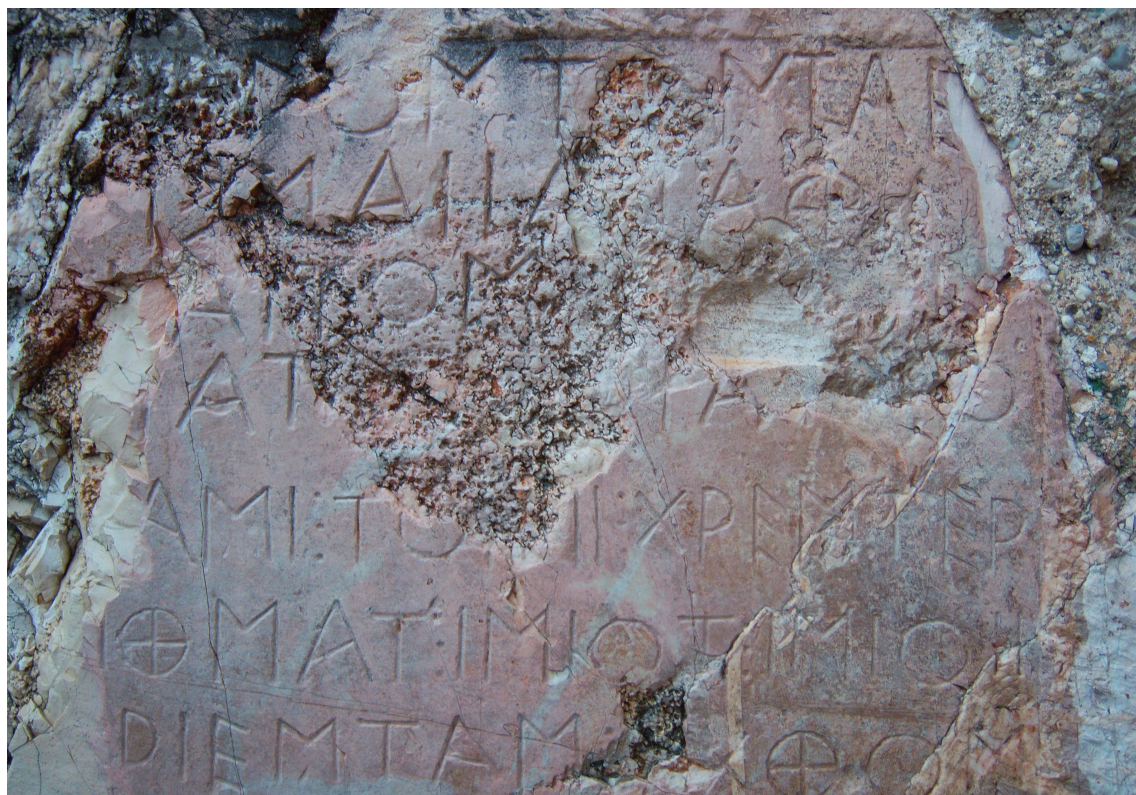

Supplementary fig. 6. Detail of stone, showing the top right-hand corner (lines 1–7) (© E. Dickey).

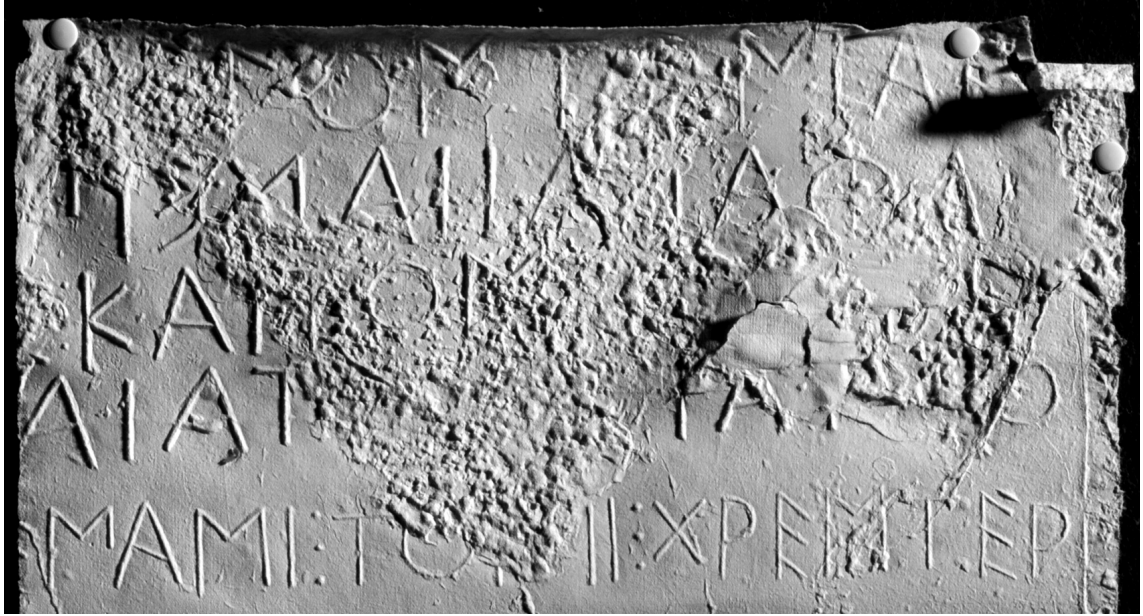

Supplementary fig. 7. Detail of Athens squeeze, showing the top right-hand corner (lines 1–5) (photograph by P. Collet, © l'École française d'Athènes).

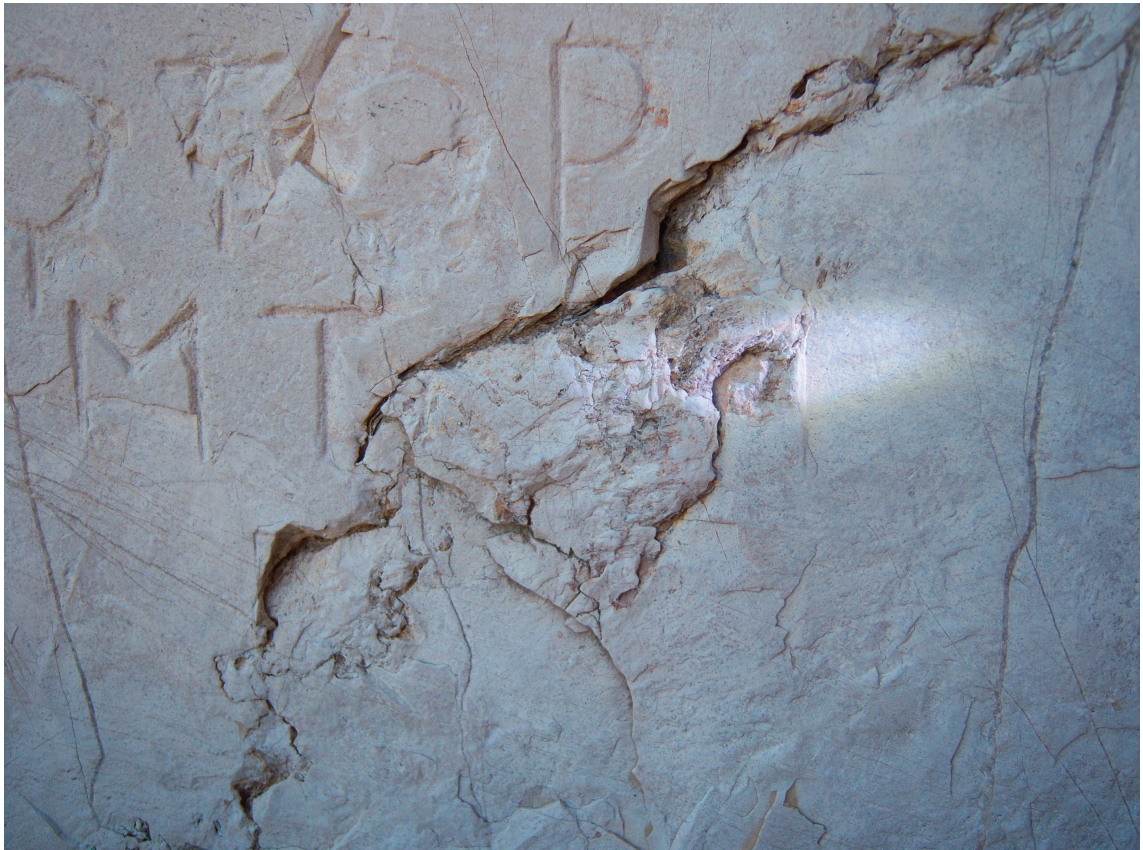

Supplementary fig. 8. Detail of stone, showing letters in line 8 read as στος and part of line 7 (© E. Dickey).

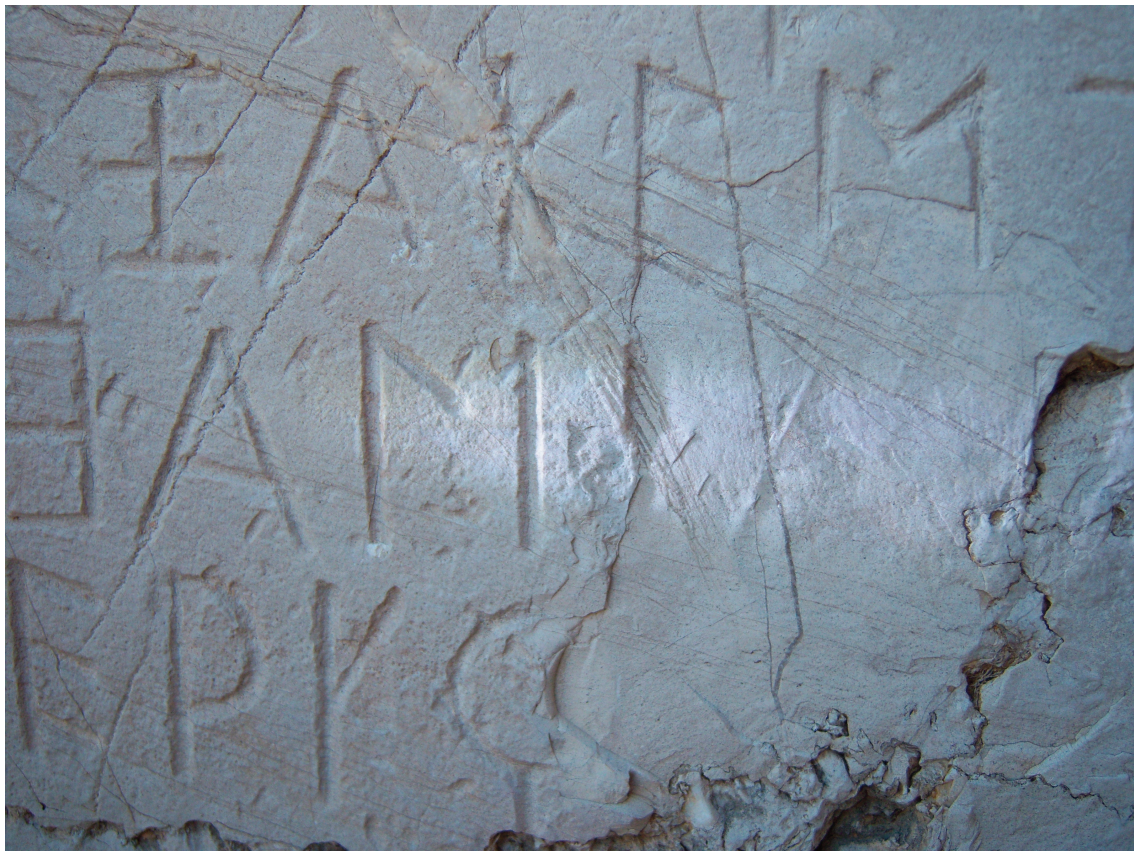

Supplementary fig. 9. Detail of stone, showing letters in line 9 read as Ἁγία and parts of lines 8 and 10 (© E. Dickey).

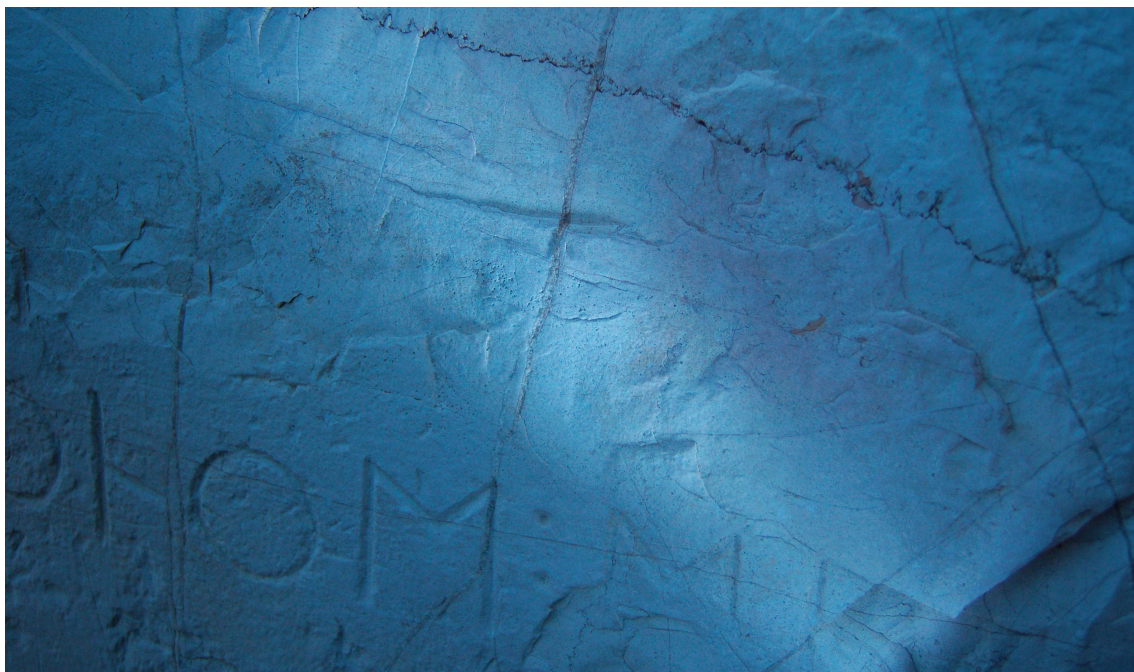

Supplementary fig. 10. Detail of stone, showing letters in line 12 read as ἐπαγ[α]γ and part of line 13 (© P. Probert).

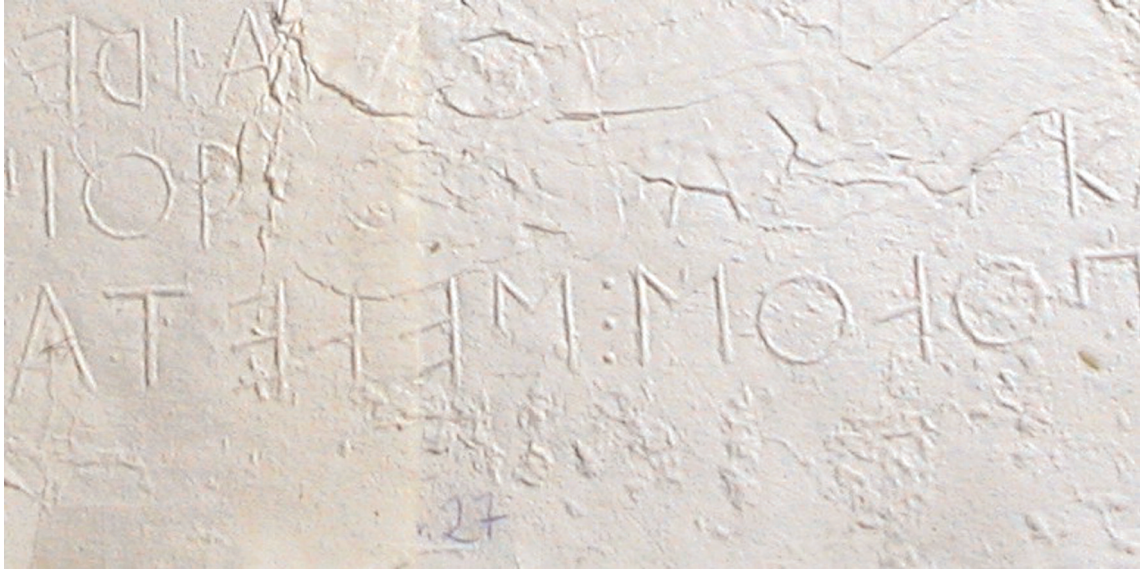

Supplementary fig. 11. Detail of Berlin squeeze, showing letters in line 12 read as ιοργ[ο]ς : ] ἐπαγ[α]υκ (and parts of lines 11 and 13), in mirror image owing to being a squeeze (photograph courtesy of the Berlin-Brandenburgische Akademie der Wissenschaften, Archiv der Inscriptiones Graecae).

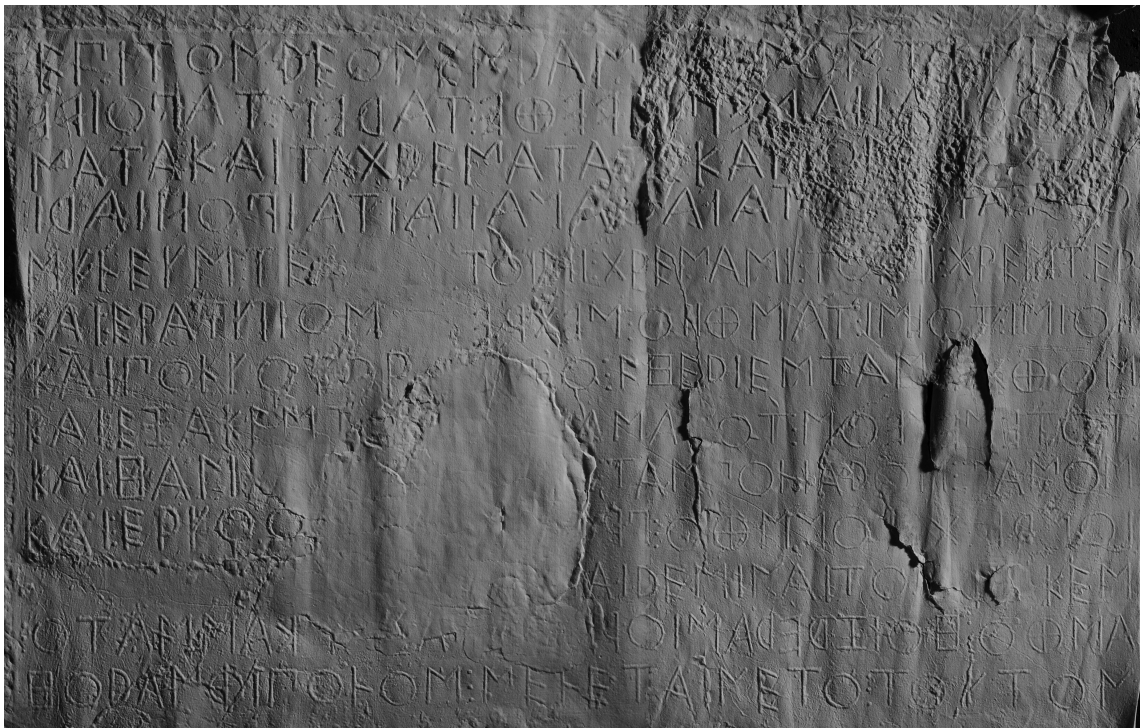

Supplementary fig. 12. The second of the Athens squeezes, photographed in mirror image to match the layout of the stone (photograph by P. Collet, © l'Ecole française d'Athènes).

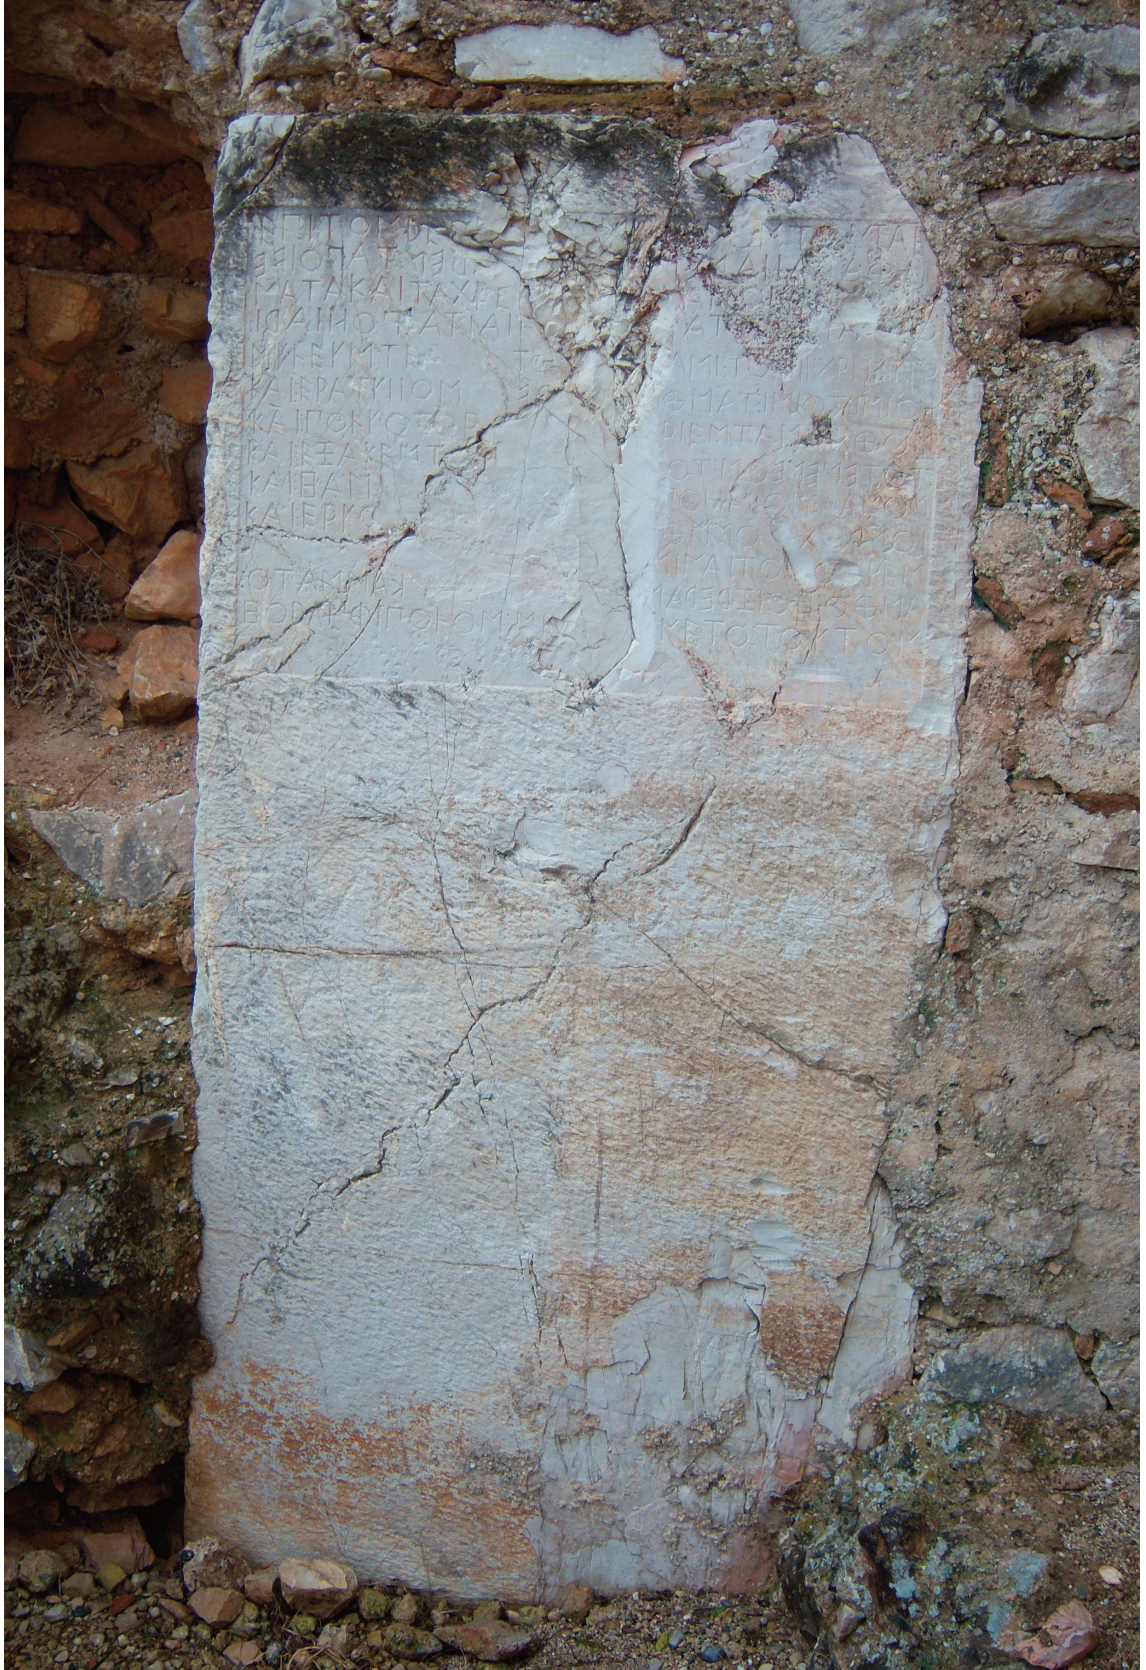

Fig. 1. Inscription *in situ* (© E. Dickey).



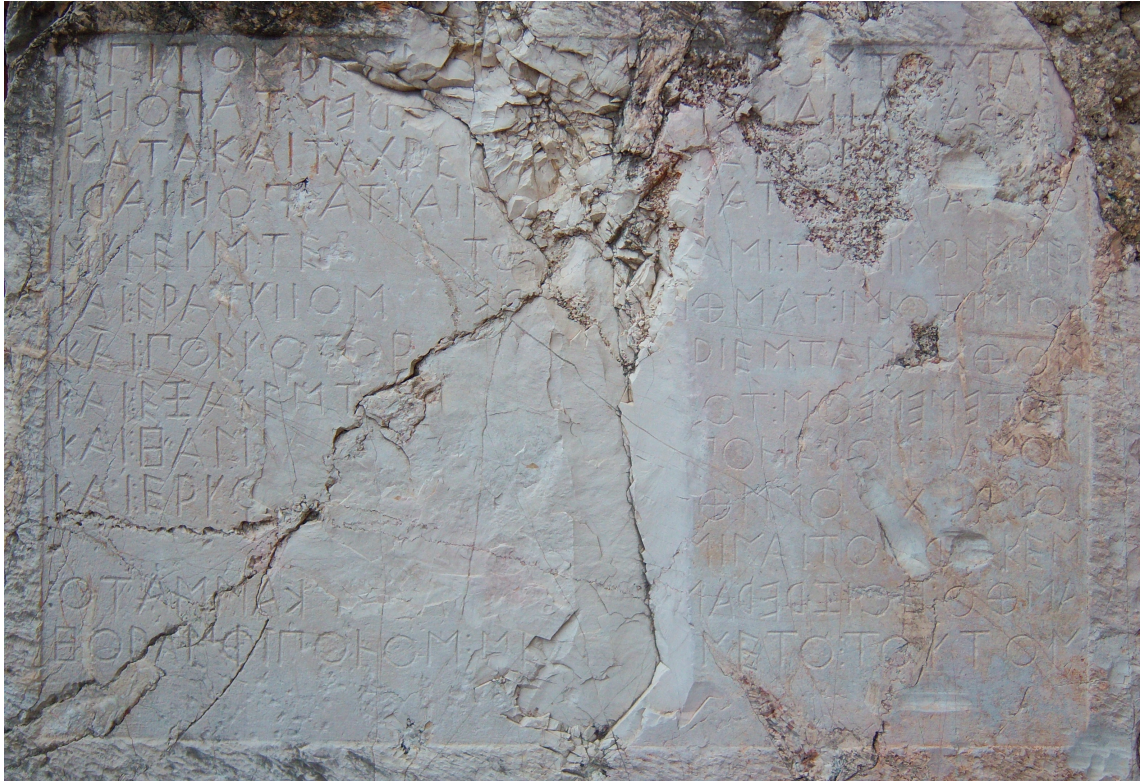

Fig. 2. Current condition of inscription (© E. Dickey).

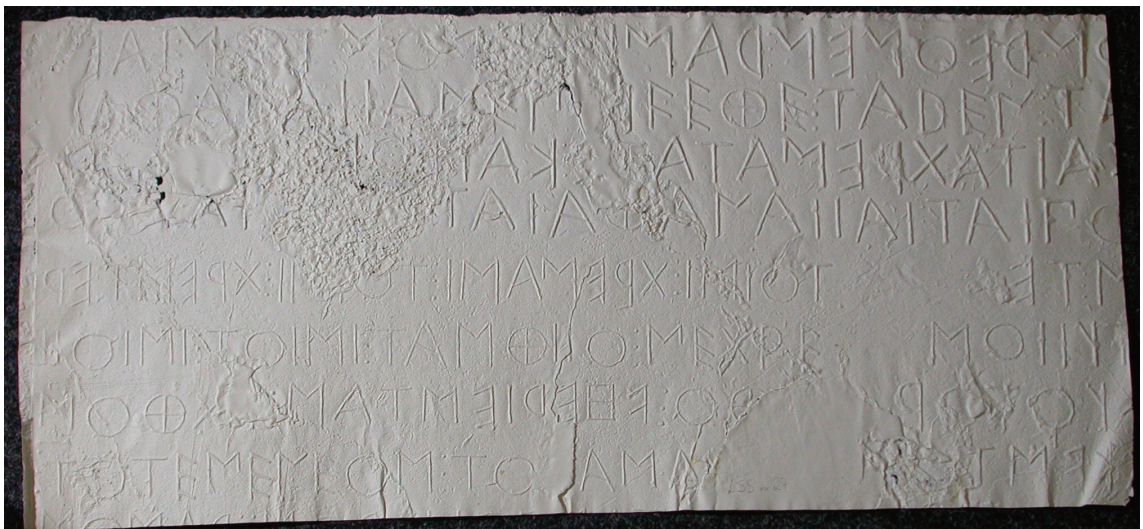

Fig. 3. Smaller Berlin squeeze (photograph courtesy of the Berlin-Brandenburgische Akademie der Wissenschaften, Archiv der Inscriptiones Graecae).

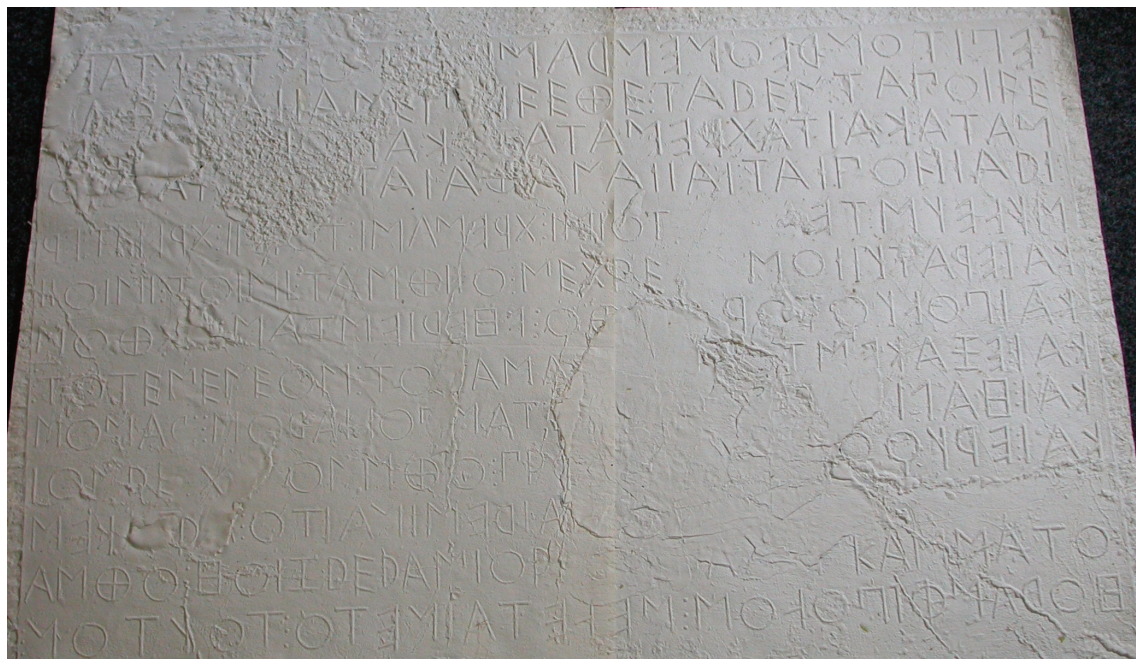

Fig. 4. Larger Berlin squeeze (photograph courtesy of the Berlin-Brandenburgische Akademie der Wissenschaften, Archiv der Inscriptiones Graecae).

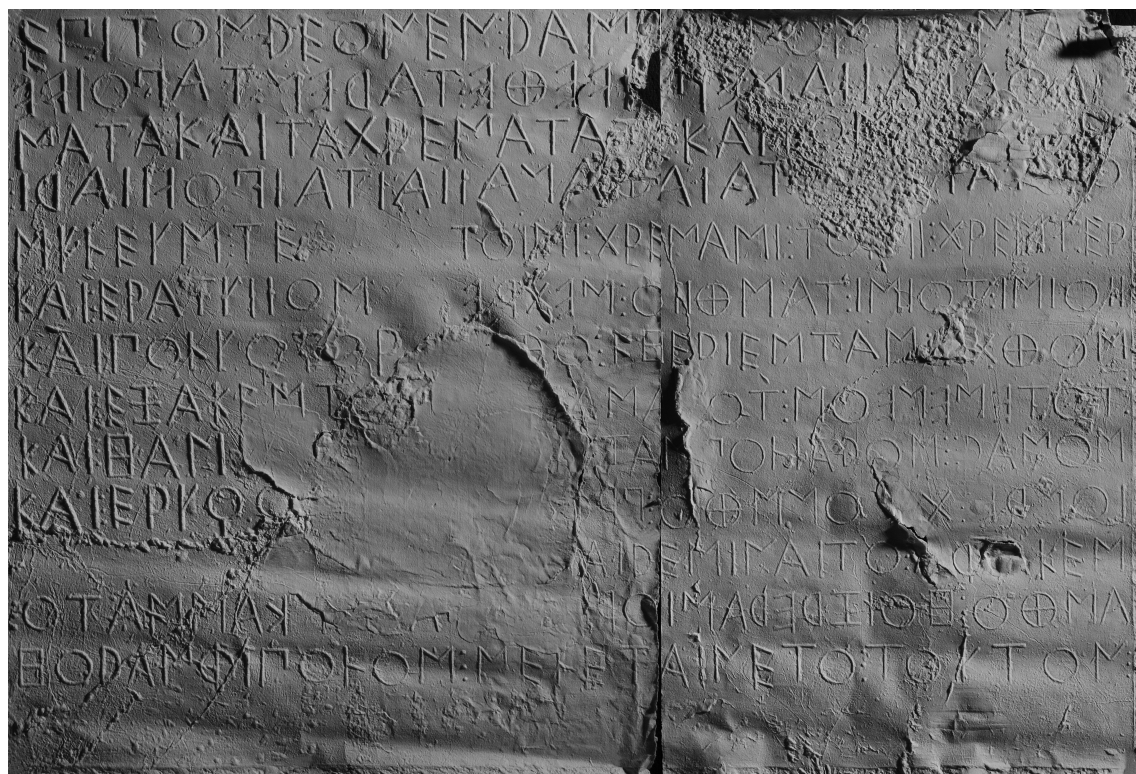

Fig. 5. One of the Athens squeezes, photographed in mirror image to match the layout of the stone (photograph by P. Collet, © l'Ecole française d'Athènes).
